# Supplementary material
Source: Springer Nature journal article supplement (https://www.springermedizin.de/resource/supplementary/13030_2013_146_MOESM1_ESM.pdf/9644844)

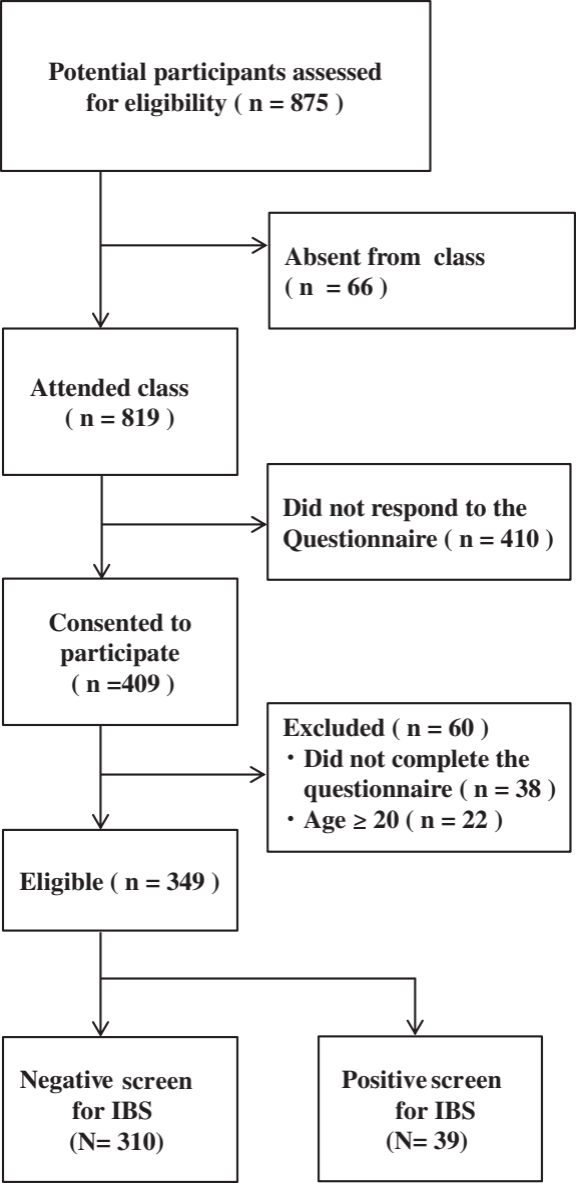

Supplement: MOESM1 [file 9644844]
